# Supplementary material for: Clinical Outcomes in Older Patients Aged over 75 Years Who Underwent Early Surgical Treatment for Pyogenic Vertebral Osteomyelitis
Source: MDPI journal article supplement (doi:10.3390/jcm10225451), 2021-11-22
Supplement: s1 [file s1]

## Supplementary Materials

**Supplementary Table S1.** Predictors of recurrence and mortality in the surgical cohort: univariable analysis.

| Variables                                      | Category                                      | Recurrence |              |         | One-Year Mortality |               |         |
|------------------------------------------------|-----------------------------------------------|------------|--------------|---------|--------------------|---------------|---------|
|                                                |                                               | Odds Ratio | 95% CI       | p-Value | Odds Ratio         | 95% CI        | p-Value |
| Age                                            | Per 1 year                                    | 0.93       | (0.82–1.05)  | 0.234   | 1.04               | (0.96–1.14)   | 0.344   |
|                                                | 80–84 vs 75–79                                | 0.31       | (0.13–7.32)  | 0.008   | 0.66               | (0.34–1.28)   | 0.217   |
|                                                | ≥85 years vs 75–79                            | 0.74       | (0.25–2.21)  | 0.585   | 1.45               | (0.60–3.49)   | 0.404   |
| Sex                                            | Male vs female                                | 1.08       | (0.49–2.40)  | 0.848   | 0.61               | (0.31–1.18)   | 0.140   |
| BMI (kg/m <sup>2</sup> )                       |                                               | 0.97       | (0.86–1.09)  | 0.586   | 1.00               | (0.91–1.10)   | 0.983   |
| Charlson Comorbidity Index (CCI) score         | Per 1 point                                   | 1.36       | (1.16–1.60)  | <0.001  | 1.58               | (1.36–1.85)   | <0.001  |
|                                                | 2 and 3 vs 0–2                                | 3.02       | (0.77–11.78) | 0.112   | 2.34               | (0.90–6.13)   | 0.083   |
|                                                | Over 4 vs 0–2                                 | 10.28      | (2.90–36.41) | <0.001  | 11.08              | (4.51–27.24)  | <0.001  |
| Comorbidities                                  | Cerebrovascular disease                       | 1.50       | (0.62–3.60)  | 0.366   | 0.69               | (0.31–1.53)   | 0.361   |
|                                                | Myocardial infarction                         | 1.22       | (0.53–2.81)  | 0.646   | 2.20               | (1.16–4.15)   | 0.015   |
|                                                | Congestive heart failure                      | 1.34       | (0.47–3.78)  | 0.585   | 3.48               | (1.62–7.47)   | 0.001   |
|                                                | Chronic obstructive pulmonary disease         | 2.58       | (0.94–7.09)  | 0.066   | 3.06               | (1.30–7.18)   | 0.010   |
|                                                | Liver cirrhosis                               | 3.14       | (1.19–8.27)  | 0.021   | 5.92               | (2.53–13.84)  | <0.001  |
|                                                | End-stage renal disease                       | 1.38       | (0.93–2.04)  | 0.114   | 1.49               | (1.09–2.05)   | 0.012   |
|                                                | Diabetes, uncomplicated                       | 0.64       | (0.23–1.80)  | 0.402   | 0.98               | (0.50–1.92)   | 0.958   |
|                                                | Diabetes, complicated                         | 5.88       | (2.26–15.29) | <0.001  | 2.06               | (0.89–4.75)   | 0.090   |
| American Spinal Injury Association Scale grade | Grade A,B and C vs grade E                    | 4.64       | (1.69–12.77) | 0.003   | 8.10               | (3.42–19.17)  | <0.001  |
|                                                | Grade D vs grade E                            | 0.97       | (0.36–2.67)  | 0.959   | 1.10               | (0.501–2.404) | 0.816   |
| Primary region                                 | Thoracic vs cervical                          | 1.72       | (0.36–8.30)  | 0.498   | 0.69               | (0.27–1.77)   | 0.435   |
|                                                | Lumbosacrum vs cervical                       | 2.76       | (0.60–12.67) | 0.193   | 1.18               | (0.48–2.91)   | 0.724   |
|                                                | Multiple vs cervical                          | 7.75       | (0.84–71.31) | 0.071   | 0.63               | (0.06–6.17)   | 0.687   |
| Presence of abscess                            | Epidural abscess                              | 1.20       | (0.26–5.48)  | 0.812   | 2.67               | (0.60–11.92)  | 0.199   |
|                                                | Posterior to epidural space                   | 0.58       | (0.25–1.31)  | 0.188   | 0.81               | (0.41–1.59)   | 0.533   |
|                                                | Anterior to epidural space                    | 1.68       | (0.74–3.84)  | 0.219   | 0.80               | (0.44–1.46)   | 0.463   |
| Number of infected vertebral bodies            | Over 3 vs within 2 vertebral bodies           | 0.99       | (0.43–2.28)  | 0.979   | 1.21               | (0.62–2.36)   | 0.575   |
| Severity of infection by Pola et al            | Type A vs C                                   | -          | -            | 0.999   | 0.99               | -             | -       |
|                                                | Type B vs C                                   | 0.94       | (0.21–4.34)  | 0.940   | 0.43               | (0.09–1.92)   | 0.265   |
| Causative organism                             | MRSA vs other gram-positive bacteria          | 4.67       | (0.97–22.57) | 0.055   | 1.05               | (0.34–3.27)   | 0.929   |
|                                                | MSSA vs other gram-positive bacteria          | 1.52       | (0.28–8.38)  | 0.630   | 1.51               | (0.51–4.48)   | 0.454   |
|                                                | Gram negative vs other gram-positive bacteria | 1.54       | (0.31–7.54)  | 0.597   | 1.06               | (0.38–2.95)   | 0.918   |

|                                            |                                                        |      |             |       |      |             |       |
|--------------------------------------------|--------------------------------------------------------|------|-------------|-------|------|-------------|-------|
|                                            | Others or unidentified vs other gram-positive bacteria | 1.22 | (0.16–9.33) | 0.850 | 1.56 | (0.45–5.43) | 0.488 |
|                                            | MRSA vs no MRSA                                        | 3.32 | (1.47–7.48) | 0.004 | 1.16 | (0.54–2.50) | 0.710 |
| White blood cell ( $\times 10^9/L$ )       | Initial                                                | 1.00 | (1.00–1.00) | 0.605 | 1.00 | (1.00–1.00) | 0.107 |
| Erythrocyte sedimentation rate (ESR, mm/h) | Initial                                                | 1.00 | (0.98–1.03) | 0.929 | 1.01 | (0.99–1.03) | 0.196 |
| C-reactive protein (CRP, mg/L)             | Initial                                                | 1.01 | (0.99–1.02) | 0.360 | 1.00 | (0.99–1.01) | 0.633 |

**Supplementary Table S2.** Comparison of baseline patient characteristics of the two surgical cohorts before and after propensity score matching.

|                                                |                                       | Whole Surgical Cohort |                     |                 | Matched Surgical Cohort |                  |                 |
|------------------------------------------------|---------------------------------------|-----------------------|---------------------|-----------------|-------------------------|------------------|-----------------|
|                                                |                                       | Non-Instrumented      | Instrumented        | <i>p</i> -Value | Non-Instrumented        | Instrumented     | <i>p</i> -Value |
|                                                |                                       | Group                 | Group               |                 | Group                   | Group            |                 |
| <b>Number of Patients</b>                      |                                       | 130                   | 115                 |                 | 80                      | 80               |                 |
| Age                                            | Median (interquartile ranges)         | 80 (79–83)            | 81 (79–82)          | 0.838           | 80 (78–82)              | 81 (79–83)       | 0.059           |
|                                                | 75 to 79 years                        | 44 (34)               | 38 (33)             | 0.979           | 32 (40)                 | 27 (34)          | 0.296           |
|                                                | 80 to 84 years                        | 69 (53)               | 61 (53)             |                 | 42 (53)                 | 41 (51)          |                 |
|                                                | ≥ 85 years                            | 17 (13)               | 16 (14)             |                 | 6 (8)                   | 12 (15)          |                 |
| Sex ratio (F : M)                              |                                       | 86 : 44               | 73 : 42             | 0.661           | 59 : 21                 | 52 : 28          | 0.230           |
| BMI (kg/m <sup>2</sup> )                       |                                       | 22.4 (21.2–24.5)      | 23.9 (21.0–26.3)    | 0.170           | 22.6 (21.5–25.1)        | 23.2 (20.8–25.7) | 0.941           |
| Charlson Comorbidity Index score               | Median (interquartile ranges)         | 3.0 (1.0–4.0)         | 2.0 (1.0–4.0)       | 0.041           | 2.0 (1.0–4.0)           | 2.0 (1.0–4.0)    | 0.970           |
|                                                | 0 and 1                               | 37 (28)               | 50 (43)             | 0.047           | 28 (35)                 | 29 (36)          | 0.982           |
|                                                | 2 and 3                               | 49 (38)               | 36 (31)             |                 | 26 (33)                 | 25 (31)          |                 |
|                                                | over 4                                | 44 (34)               | 29 (25)             |                 | 26 (33)                 | 26 (33)          |                 |
| Comorbidities                                  | Cerebrovascular disease               | 27 (21)               | 26 (23)             | 0.727           | 14 (18)                 | 15 (19)          | 0.837           |
|                                                | Myocardial infarction                 | 36 (28)               | 29 (25)             | 0.661           | 22 (28)                 | 25 (31)          | 0.603           |
|                                                | Congestive heart failure              | 22 (17)               | 11 (10)             | 0.092           | 12 (15)                 | 10 (13)          | 0.646           |
|                                                | Chronic obstructive pulmonary disease | 15 (12)               | 10 (9)              | 0.463           | 5 (6)                   | 7 (9)            | 0.548           |
|                                                | Liver cirrhosis                       | 17 (13)               | 9 (8)               | 0.183           | 9 (11)                  | 8 (10)           | 0.798           |
|                                                | End-stage renal disease               | 41 (32)               | 27 (23)             | 0.160           | 24 (30)                 | 24 (30)          | 1.000           |
|                                                | Diabetes                              |                       |                     | 0.612           |                         |                  | 0.940           |
|                                                | Complicated *                         | 60 (46)               | 52 (45)             |                 | 36 (45)                 | 38 (48)          |                 |
| Bone Mineral density (g/cm <sup>2</sup> )      | Uncomplicated                         | 22 (17)               | 15 (13)             |                 | 14 (18)                 | 14 (18)          |                 |
|                                                |                                       |                       |                     |                 |                         |                  |                 |
| Spine                                          |                                       | 0.854 (0.732–1.010)   | 0.892 (0.777–0.981) | 0.317           | 862 (755–931)           | 867 (783–934)    | 0.854           |
|                                                | Femur                                 | 0.645 (0.575–0.743)   | 0.700 (0.609–0.757) | 0.101           | 654 (575–776)           | 710 (614–787)    | 0.460           |
| American Spinal Injury Association Scale grade | Grade A,B and C                       | 18 (14)               | 25 (22)             | 0.118           | 13 (16)                 | 18 (23)          | 0.023           |
|                                                | Grade D                               | 71 (55)               | 49 (43)             |                 | 52 (65)                 | 35 (44)          |                 |
|                                                | Grade E                               | 41 (32)               | 41(36)              |                 | 15 (19)                 | 27 (34)          |                 |
| Duration of intravenous antibiotics (days)     |                                       | 44 (42–56)            | 52 (45–63)          | <0.001          | 54 (42–59)              | 52 (45–61)       | 0.224           |
| Hospital stay (days)                           |                                       | 52 (47–59)            | 54 (47–63)          | 0.084           | 53 (48–63)              | 54 (47–63)       | 0.710           |
| Follow-up period                               |                                       | 801 (478–1262)        | 1036 (597–1457)     |                 | 855 ± 583               | 1050 ± 723       |                 |

\* Complicated diabetes was defined as diabetes associated with damage of end organs including cardiovascular system, kidneys, eyes, and nervous system, and it included peripheral neuropathy, nephropathy, retinopathy, and peripheral artery disease.

**Supplementary Table S3.** Comparison of infection profiles of the two surgical cohorts before and after propensity score matching.

|                                            |                              | Whole Surgical Cohort |                     |                 | Matched Surgical Cohort |                     |                 |
|--------------------------------------------|------------------------------|-----------------------|---------------------|-----------------|-------------------------|---------------------|-----------------|
|                                            |                              | Non-Instrumented      | Instrumented        | <i>p</i> -Value | Non-Instrumented        | Instrumented Group  | <i>p</i> -Value |
|                                            |                              | Group                 | Group               |                 | Group                   |                     |                 |
| Primary region                             | Cervical spine               | 10 (8)                | 23 (20)             | 0.022           | 8 (10)                  | 12 (15)             | 0.812           |
|                                            | Thoracic spine               | 52 (40)               | 48 (42)             |                 | 33(41)                  | 30 (38)             |                 |
|                                            | Lumbosacrum                  | 64 (49)               | 42 (37)             |                 | 37 (46)                 | 36 (45)             |                 |
|                                            | Multiple                     | 4 (3)                 | 2 (2)               |                 | 2 (3)                   | 2 (3)               |                 |
| Presence of abscess                        | Epidural abscess             | 115 (88)              | 111 (97)            | 0.019           | 73 (91)                 | 76 (95)             | 0.349           |
|                                            | Posterior to epidural space  | 96 (74)               | 91 (79)             |                 | 58 (73)                 | 63 (79)             |                 |
|                                            | Anterior to epidural space   | 81 (62)               | 66 (57)             |                 | 47 (59)                 | 49 (61)             |                 |
| Number of infected vertebral bodies        | within 2 vertebral bodies    | 95 (73)               | 77 (67)             | 0.296           | 61 (76)                 | 52 (65)             | 0.118           |
|                                            | over 3 vertebral bodies      | 35 (27)               | 38 (33)             |                 | 19 (24)                 | 28 (35)             |                 |
| Severity of infection by Pola et al        | Type A                       | 2 (2)                 | 0 (0)               | 0.015           | 0 (0)                   | 0 (0)               | 0.349           |
|                                            | Type B                       | 13 (10)               | 4 (3)               |                 | 7 (9)                   | 4 (5)               |                 |
|                                            | Type C                       | 115 (88)              | 111 (97)            |                 | 73 (91)                 | 76 (95)             |                 |
| Causative organism                         | Staphylococcus aureus        | 52 (40)               | 47 (41)             | 0.586           | 28 (35)                 | 38 (48)             | 0.373           |
|                                            | Methicillin resistant        | 24 (18)               | 24 (21)             |                 | 11 (14)                 | 20 (25)             |                 |
|                                            | Methicillin sensitive        | 28 (22)               | 23 (20)             |                 | 17 (21)                 | 18 (23)             |                 |
|                                            | Other gram-positive bacteria | 15 (12)               | 15 (13)             |                 | 11 (14)                 | 9 (11)              |                 |
|                                            | Gram-negative bacteria       | 46 (35)               | 45 (39)             |                 | 32 (40)                 | 28 (35)             |                 |
|                                            | Others or unidentified       | 17 (13)               | 8 (7)               |                 | 9 (11)                  | 5 (6)               |                 |
| White blood cell ( $\times 10^9/L$ )       | Initial                      | 12679 (10105–15436)   | 13060 (10330–16799) | 0.155           | 12223 (9962–15747)      | 13309 (10268–16799) | 0.302           |
| Erythrocyte sedimentation rate (ESR, mm/h) | Initial                      | 62 (47–71)            | 69 (53–75)          | 0.008           | 68 (52–74)              | 68 (50–72)          | 0.797           |
| C-reactive protein (CRP, mg/L)             | Initial                      | 69 (58–83)            | 75 (67–88)          | 0.036           | 70 (63–86)              | 77 (62–93)          | 0.726           |

**Supplementary Table S4.** Comparison of Surgical profiles and treatment outcome of the two surgical cohorts before and after propensity score matching.

|                                       |                                                                | Whole Surgical Cohort     |                       |                 | Matched Surgical Cohort   |                       |                 |
|---------------------------------------|----------------------------------------------------------------|---------------------------|-----------------------|-----------------|---------------------------|-----------------------|-----------------|
|                                       |                                                                | Non-Instrumented<br>Group | Instrumented<br>Group | <i>p</i> -Value | Non-Instrumented<br>Group | Instrumented<br>Group | <i>p</i> -Value |
| Time between diagnosis<br>and surgery | <2 weeks                                                       | 95 (73)                   | 89 (77)               | 0.207           | 68 (85)                   | 61 (76)               | 0.312           |
|                                       | 2 to 4 weeks                                                   | 20 (15)                   | 20 (17)               |                 | 10 (13)                   | 14 (18)               |                 |
|                                       | 4 to 6 weeks                                                   | 15 (12)                   | 6 (5)                 |                 | 2 (3)                     | 5 (6)                 |                 |
| Surgical approach                     | Anterior                                                       | 6 (5)                     | 18 (16)               |                 | 4 (5)                     | 18 (23)               |                 |
|                                       | Posterior                                                      | 124 (95)                  | 89 (77)               |                 | 76 (95)                   | 54 (68)               |                 |
|                                       | Anterior + Posterior                                           |                           | 8 (7)                 |                 |                           | 8 (10)                |                 |
| Surgery related<br>complications      | Overall reoperation                                            | 10 (8)                    | 11 (10)               | 0.601           | 7 (9)                     | 8 (10)                | 1.000           |
|                                       | Implant failure                                                |                           | 8 (7)                 |                 |                           | 4 (5)                 |                 |
|                                       | Wound dehiscence                                               | 7 (5)                     | 9 (8)                 |                 | 3 (4)                     | 6 (8)                 |                 |
| Medical events after<br>surgery       | At least one of the following<br>complications                 | 39 (30)                   | 25 (22)               | 0.142           | 16 (20)                   | 14 (18)               | 0.685           |
|                                       | Cardiac event                                                  | 11 (8)                    | 7 (6)                 |                 | 3 (4)                     | 4 (5)                 |                 |
|                                       | Respiratory complication                                       | 25 (19)                   | 15 (13)               |                 | 11 (14)                   | 8 (10)                |                 |
|                                       | Cerebrovascular complication                                   | 4 (3)                     | 4 (3)                 |                 | 1 (1)                     | 2 (3)                 |                 |
|                                       | Pulmonary embolism                                             | 8 (6)                     | 4 (3)                 |                 | 3 (4)                     | 2 (3)                 |                 |
| Recurrence                            | Occurrence                                                     | 19 (15)                   | 11 (10)               | 0.229           | 8 (10)                    | 10 (13)               | 0.617           |
|                                       | Interval between initial<br>diagnosis and recurrence<br>(days) | 39 (23–57)                | 142 (96–194)          |                 | 34 (25–52)                | 139 (94–206)          |                 |
| Mortality                             | 90-day mortality                                               | 14 (11)                   | 10 (9)                | 0.586           | 6 (8)                     | 8 (10)                | 0.576           |
|                                       | 1-year mortality                                               | 36 (28)                   | 20 (17)               | 0.055           | 18 (23)                   | 18 (23)               | 1.000           |

**Supplementary Table S5.** Causative organisms of the three groups.

| Types of Bacteria            |                                             | Conservative Group | Non-Instrumented Group | Instrumented Group |
|------------------------------|---------------------------------------------|--------------------|------------------------|--------------------|
| Staphylococcus aureus        | Methicillin-Resistant Staphylococcus aureus | 40                 | 24                     | 24                 |
|                              | Methicillin-Sensitive Staphylococcus aureus | 38                 | 28                     | 23                 |
| Other gram-positive bacteria | Coagulase-negative staphylococci            | 10                 | 7                      | 5                  |
|                              | Streptococcus pneumoniae                    | 2                  | 0                      | 2                  |
|                              | Streptococcus agalactiae                    | 3                  | 4                      | 4                  |
|                              | Streptococcus viridans                      | 3                  | 1                      | 0                  |
|                              | Enterococcus faecalis                       | 5                  | 1                      | 2                  |
|                              | Enterococcus faecium                        | 0                  | 2                      | 2                  |
| Gram-negative bacteria       | Escherichia coli                            | 30                 | 22                     | 17                 |
|                              | Pseudomonas aeruginosa                      | 17                 | 8                      | 11                 |
|                              | Acinetobacter baumannii                     | 5                  | 2                      | 1                  |
|                              | Klebsiella pneumoniae                       | 6                  | 7                      | 9                  |
|                              | Salmonella enterica                         | 4                  | 6                      | 4                  |
|                              | Enterobacter cloacae                        | 3                  | 0                      | 1                  |
|                              | Enterobacter aerogenes                      | 2                  | 0                      | 0                  |
|                              | Other Enterobacteriaceae                    | 3                  | 1                      | 2                  |
| Others                       | Anaerobe                                    | 5                  | 1                      | 0                  |
|                              | Mixed infection                             | 5                  | 4                      | 5                  |
| Unidentified                 |                                             | 13                 | 12                     | 3                  |

The causative organisms were categorized as “unidentified” when initial culture results were suspected to be contaminated from subsequent antibiotic response or when they showed different culture results from subsequent cultures.
